# Supplementary material for: Cross-cultural Adaptation And Validation Of Maslow’s Hierarchy Of Needs Instrument In Bahasa Melayu (MHON-BM)
Source: Research Square preprint supplement (doi:10.21203/rs.3.rs-8415704/v1), 2026-01-16
Supplement: Supplementary file 1 [file 8eafcbe755c24d0c93666849.docx]

**Supplementary tables**

Table S1. Pretest version

| ***Original Item English*** | ***Translated Item Bahasa Melayu*** |
| --- | --- |
| ***Physiological Needs Satisfaction Scale*** | ***Skala kepuasan keperluan fungsi badan*** |
| 1.The quality of the food I eat every day | Saya sangat berpuashati dengan kualiti makanan yang saya makan setiap hari |
| 2. The amount of food that I eat every day | Saya sangat berpuashati dengan kuantiti makanan yang saya makan setiap hari |
| 3. The quality of the water I drink every day | Saya sangat berpuashati dengan kualiti air yang saya minum setiap hari |
| 4. The amount of water that I drink every day | Saya sangat berpuashati dengan kuantiti air yang saya minum setiap hari |
| 5. The amount of heating I have when the weather is cold | Saya sangat berpuashati dengan kediaman saya bagi berlindung daripada hujan |
| 6. The amount of cooling I have when the weather is hot | Saya sangat berpuashati dengan kediaman saya bagi berlindung daripada cuaca panas |
| 7. The quality of the air I breathe every day | Saya sangat berpuashati dengan kualiti udara yang saya hidu setiap hari |
| 8. The amount of sex I am having | Saya sangat berpuashati dengan jumlah hubungan kelamin (seksual) saya |
| 9. The quality of sex I am having | Saya sangat berpuashati dengan kualiti hubungan kelamin (seksual) saya |
| 10. Every aspect of my physical health | Saya sangat berpuashati dengan kesihatan keseluruhan tubuh badan saya |
| 11. The amount of sleep I get to feel thoroughly relaxed | Saya sangat berpuashati dengan jumlah tidur yang saya dapat untuk saya berasa tenang |
| 12. The quality of sleep I get to feel fully refreshed | Saya sangat berpuashati dengan kualiti tidur yang saya dapat untuk menjadikan saya bertenaga |
| 13. The amount of exercise I get to keep me healthy | Saya sangat berpuashati dengan jumlah senaman yang saya buat untuk kekal sihat |
| 14. The type of exercise I get to keep my body toned | Saya sangat berpuashati dengan jenis senaman yang saya buat untuk kekal cergas |
| 15. My overall physical strength | Saya sangat berpuashati dengan kekuatan fizikal saya secara keseluruhan |
| ***Safety–Security Needs Satisfaction Scale*** | ***Skala Kepuasan keperluan jaminan keselamatan*** |
| 1. The quality of the house/apartment I am living in | Saya sangat berpuashati dengan kualiti rumah/ tempat tinggal yang saya duduki |
| 2. The space available for me in my house/apartment | Saya sangat berpuashati dengan ruang yang ada untuk saya di dalam rumah/ tempat tinggal |
| 3. How secure I am in my house/apartment | Saya sangat berpuashati dengan keselamatan saya di dalam rumah/ tempat tinggal |
| 4. How safe I am from being physically attacked | Saya sangat berpuashati dengan keselamatan saya daripada serangan fizikal |
| 5. The safety of my neighbourhood | Saya sangat berpuashati dengan Keselamatan di kejiranan saya. |
| 6. How safe I am from catching any diseases | Saya sangat berpuashati dengan kesihatan saya daripada sebarang penyakit |
| 7. How secure I am from disasters | Saya sangat berpuashati dengan keselamatan saya daripada sebarang bencana |
| 8. How protected I am from dangers in the environment | Saya sangat berpuashati dengan perlindungan daripada persekitaran yang bahaya |
| 9. The protection that the police provide for me | Saya sangat berpuashati dengan perlindungan yang pihak polis sediakan untuk saya |
| 10. The protection that the law provides for me | Saya sangat berpuashati dengan perlindungan undang-undang yang saya perolehi |
| 11. How safe I am from destructive terrorist acts | Saya sangat berpuashati dengan keselamatan saya daripada tindakan pengganas |
| 12. How safe I am from acts of war | Saya sangat berpuashati dengan keselamatan saya daripada ancaman peperangan |
| 13. My financial security | Saya sangat berpuashati dengan status kewangan saya |
| 14. My ability to get money whenever I need it | Saya sangat berpuashati dengan kemampuan saya untuk mendapat duit apabila saya memerlukannya |
| 15. The money I reserved for me to have a secure retirement | Saya sangat berpuashati dengan persediaan kewangan untuk masa tua |
| ***Belongingness Needs Satisfaction Scale*** | ***Skala kepuasan keperluan perhubungan*** |
| 1. The amount of rapport I share with the people I know | Saya sangat berpuashati dengan tahap perhubungan yang saya kongsi dengan orang yang saya kenal |
| 2. The quality of the relationships I have with my friends | Saya sangat berpuashati dengan kualiti perhubungan saya dengan rakan-rakan |
| 3.The love I receive from my spouse/partner | Saya sangat berpuashati dengan kasih sayang yang saya dapat daripada pasangan |
| 4. The intimacy I share with my immediate family | Saya sangat berpuashati dengan keakraban sesama ahli keluarga terdekat |
| 5. The camaraderie I share with my colleagues | Saya sangat berpuashati dengan kemesraan yang saya kongsikan bersama teman-teman |
| 6. How much I am welcomed in my community | Saya sangat berpuashati dengan penerimaan masyarakat terhadap saya |
| 7. The warmth I share with my relatives | Saya sangat berpuashati dengan kemesraan saya bersama saudara-mara |
| 8. The emotional support I receive from my friends | Saya sangat berpuashati dengan sokongan emosi yang saya terima daripada rakan-rakan |
| 9. The feeling of togetherness I have with my family | Saya sangat berpuashati dengan semangat kekeluargaan bersama ahli keluarga |
| 10. How much I am cared for by my spouse/partner | Saya sangat berpuashati dengan layanan pasangan saya |
| 11. The happiness I share with my companions | Saya sangat berpuashati dengan Kegembiraan yang saya kongsi dengan rakan-rakan |
| 12. The sympathy I receive from my confidants | Saya sangat berpuashati dengan belas ihsan yang saya terima daripada orang yang saya percayai |
| 13. The enjoyment I share with associates | Saya sangat berpuashati dengan keseronokan yang saya kongsi dengan rakan-rakan |
| 14. The affection shown to me by my friends | Saya sangat berpuashati dengan kemesraan yang ditunjukkan oleh rakan-rakan |
| 15. The closeness I feel with my associates | Saya sangat berpuashati dengan keakraban bersama rakan seperjuangan |

Table S2. Cross-cultural adaptation process -

| **Stage** | **Outcome** |
| --- | --- |
| First expert committee meeting | The initial evaluation by the expert committee on the conceptual relevance and understandability of the original MHON instrument by the target population concluded that the instrument could apply to the Malaysian population in general. |
| Forward translation | The forward translation was carried out independently by two qualified bilingual translators. |
| Synthesis by an expert committee | They reviewed the forward translations for comprehensiveness, as well as semantic, linguistic, and experiential equivalence. |
| Backwards translation | The single Bahasa Melayu version of the instrument was subsequently back-translated into English by a team of two independent bilingual translators. |
| Final expert panel meeting | Their evaluation confirmed that the translated items accurately captured the content and intent of the original English instrument. |
| Pre-test | The pre-test involved 54 participants (mean age = 43.0, SD = 15.8), mostly females, married, and with secondary education. |

Table S 3. Test-retest and linguistic equivalence results for the combined scale; results for the individual PNSS, SNSS, and BNSS subscales are also provided.

| **45 items Combined scale (n=150)** | | | | | | | | |
| --- | --- | --- | --- | --- | --- | --- | --- | --- |
| **Item** | **Linguistic equivalence** | **Test-retest** | **Item** | **Linguistic equivalence** | **Test-retest** | **Item** | **Linguistic equivalence** | **Test-retest** |
|  | **15 item PNSS** | |  | **15 item SNSS** | |  | **15 item BNSS** | |
|  | **r** | **ICC (95% CI)** |  | **r** | **ICC (95%CI)** |  | **r** | **ICC (95% CI)** |
| 1 | 0.62* | 0.94  (0.87, 0.97) | 16 | 0.96* | 0.90  (0.76, 0.96) | 31 | 0.84* | 0.90  (0.76, 0.96) |
| 2 | 0.84* | 0.95  (0.90, 0.98) | 17 | 0.88* | 0.87  (0.70, 0.95) | 32 | 0.95* | 0.87  (0.70, 0.95) |
| 3 | 0.70* | 0.97  (0.94, 0.99) | 18 | 0.92* | 0.87  (0.73, 0.94) | 33 | 0.95* | 0.87  (0.73, 0.94) |
| 4 | 0.89* | 0.97  (0.93, 0.99) | 19 | 0.74* | 0.69  (0.37, 0.85) | 34 | 0.77* | 0.69  (0.37, 0.85) |
| 5 | 0.86* | 0.58 (  0.12, 0.81) | 20 | 0.97* | 0.78  (0.57, 0.90) | 35 | 1.00* | 0.78  (0.57, 0.90) |
| 6 | 0.92* | 0.80  (0.54, 0.91) | 21 | 0.97* | 0.75  (0.53, 0.88) | 36 | 0.96* | 0.75  (0.53, 0.88) |
| 7 | 0.94* | 0.99  (0.98, 1.00) | 22 | 0.92* | 0.85  (0.70, 0.93) | 37 | 0.90* | 0.84  (0.66, 0.93) |
| 8 | 0.97* | 1.00 | 23 | 0.93* | 0.91  (0.82, 0.96) | 38 | 1.00* | 0.84  (0.66, 0.93) |
| 9 | 0.97* | 1.00 | 24 | 0.96* | 0.96  (0.92, 0.98) | 39 | 0.82* | 0.98  (0.95, 0.99) |
| 10 | 0.81* | 0.90  (0.79, 0.96) | 25 | 0.97* | 0.86  (0.71, 0.93) | 40 | 0.94* | 0.98  (0.96, 0.99) |
| 11 | 0.74* | 0.96 (0.91, 0.98) | 26 | 0.87* | 0.75  (0.53, 0.88) | 41 | 0.93* | 0.99  (0.97, 0.99) |
| 12 | 0.76* | 0.96 (0.91, 0.98) | 27 | 0.89* | 0.68  (0.41, 0.84) | 42 | 0.89* | 1.00 |
| 13 | 1.00* | 0.96 (0.91, 0.98) | 28 | 0.85* | 0.90  (0.80, 0.96) | 43 | 0.94* | 0.96  (0.90, 0.98) |
| 14 | 1.00* | 0.97 (0.93, 0.99) | 29 | 0.91* | 0.67  (0.40, 0.84) | 44 | 0.94* | 0.98  (0.95, 0.99) |
| 15 | 0.90* | 0.91  (0.80, 0.96) | 30 | 0.65* | 0.88  (0.76, 0.94) | 45 | 0.96* | 0.93  (0.85, 0.97) |

*p < 0.01

Table S4. Summary of reliability results for combined scale and subscales

(N = 300)

| **Measure (n=300)** | **No. of items** | **Cronbach’s α** | **Guttman split-half**  **coefficient** |
| --- | --- | --- | --- |
| **Combined Scale** | 45 | 0.97 | 0.90 |
| **PNSS** | 15 | 0.92 | 0.77 |
| **SNSS** | 15 | 0.95 | 0.86 |
| **BNSS** | 15 | 0.95 | 0.91 |
|  |  |  |  |

Table S5. Summary of factor analysis results for combined scale and subscales (N = 300)

| **Measure (n=300)** | **KMO** | **Bartlett’s χ² (df)** | **p-value** | **No. of components** | **Highest loading range** |
| --- | --- | --- | --- | --- | --- |
| **Combined Scale** | 0.935 | 13,597.75 (990) | <0.001 | 8 | 0.44–0.85 |
| **PNSS** | 0.86 | 3,878.26 (105) | <0.001 | 4 | 0.56–0.78 |
| **SNSS** | 0.92 | 3,942.46 (105) | <0.001 | 3 | 0.69–0.85 |
| **BNSS** | 0.91 | 4,246.55 (105) | <0.001 | 2 | 0.75–0.96 |

Table S6. Convergent validity of PNSS, SNSS, and BNSS with related instruments. Pearson correlation coefficients (r) are shown; all correlations were statistically significant (p < 0.01)

| **Measure (n=300)** | **Correlated Instrument** | **Pearson's r** | **p-value** |
| --- | --- | --- | --- |
| **PNSS** | Q-WHOQOL | 0.36 | <0.01 |
| **SNSS** | LTE-Q | -0.31 | <0.01 |
| **BNSS** | MSPSS | 0.56 | <0.01 |

Table S7. Discriminant validity: Comparison of needs satisfaction scores by monthly income group

| **Measure (n=300)** | **<RM1200 (n=150)**  **M (sd)** | **≥RM1200 (n=150)**  **M (sd)** | **Mean Difference (95% CI)** | **p-value** |
| --- | --- | --- | --- | --- |
| **PNSS** | 57.57 (8.23) | 59.71 (8.35) | 2.14  (0.26, 4.02) | 0.03 |
| **SNSS** | 55.67 (9.03) | 59.12 (10.39) | 3.45  (1.24, 5.66) | <0.01 |
| **BNSS** | 59.99 (7.73) | 62.03 (8.47) | 2.04  (0.20, 3.88) | 0.03 |
| **Combined**  **Scale** | 173.25 (22.00) | 180.85 (24.90) | 7.60  (2.26, 12.94) | 0.01 |
